# Supplementary material for: Macrophages unlock progression of breast cancer cells experiencing matrigel-segregation in transplantation models
Source: PubMed Central journal article supplement (PMC5591247; doi:10.1038/s41598-017-11403-w), 2017-09-08
Supplement: 41598_2017_11403_MOESM1_ESM.pdf [file 41598_2017_11403_MOESM1_ESM.pdf]

**Title:**

Macrophages unlock progression of breast cancer cells experiencing  
*matrigel-segregation* in transplantation models

**Authors:**

Misa Ogura<sup>1\*</sup>, Victoria L. Bridgeman<sup>1\*</sup>, Ilaria Malanchi<sup>1#</sup>

Tumour Host Interaction Lab, The Francis Crick Institute, 1 Midland Rd, NW1 1AT London, UK.

\* These authors have contributed equally to this work.

# Corresponding author, [Ilaria.Malanchi@crick.ac.uk](mailto:Ilaria.Malanchi@crick.ac.uk).

## Supplementary Figure and Legend

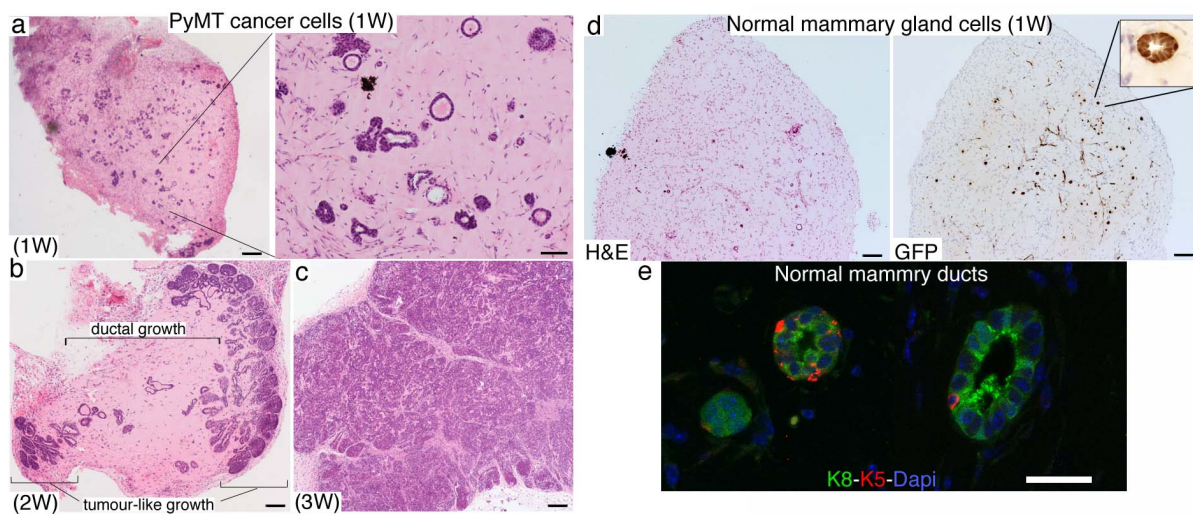

### Supplementary Figure 1. Development of PyMT transplants over time

**a-d** H&E of PyMT transplants at 1 week (**a**), 2 weeks (**b**) or 3 weeks (**c**) post-transplantation in growth factor reduced matrigel. Scale bar: 200  $\mu\text{m}$ . Inset: close up of 1 week PyMT transplant. Scale bar: 50  $\mu\text{m}$ . **d** H&E (left panel) and immunohistochemistry for GFP staining (right panel) of primary normal mammary epithelial cells isolated from actin GFP+ transgenic mice at 1 week post-transplantation. **c** Immunofluorescence staining for cytokeratin-8 (K8; green), cytokeratin-5 (K5; red) and DAPI (blue) of normal ducts formed in primary normal mammary epithelial cells transplants after 1 week. Scale bar: 20  $\mu\text{m}$ .

Table of host infiltrating components

| Cell type                   | 1W  | 2W  | 3W  |
|-----------------------------|-----|-----|-----|
| $\alpha$ SMA<br>Fibroblasts | +/- | +   | +++ |
| Endomucin<br>Endothelial    | -   | +   | ++  |
| Lyve-1<br>Lymphatic         | ND  | ND  | ND  |
| F4/80<br>Macrophages        | +++ | +++ | ++  |
| S100A9<br>Neutrophils       | ND  | ND  | ND  |
| CD3<br>T Cells              | +/- | +/- | ND  |
| B220<br>B cells             | ND  | ND  | ND  |

### Supplementary Table 1. Analysis of stromal infiltrate in transplanted PyMT plugs

Summary of host-infiltrating cells in tumour transplants harvested at week 1, 2 or 3 post-transplantation in growth factor reduced matrigel analysed by the indicated immunohistochemical staining.

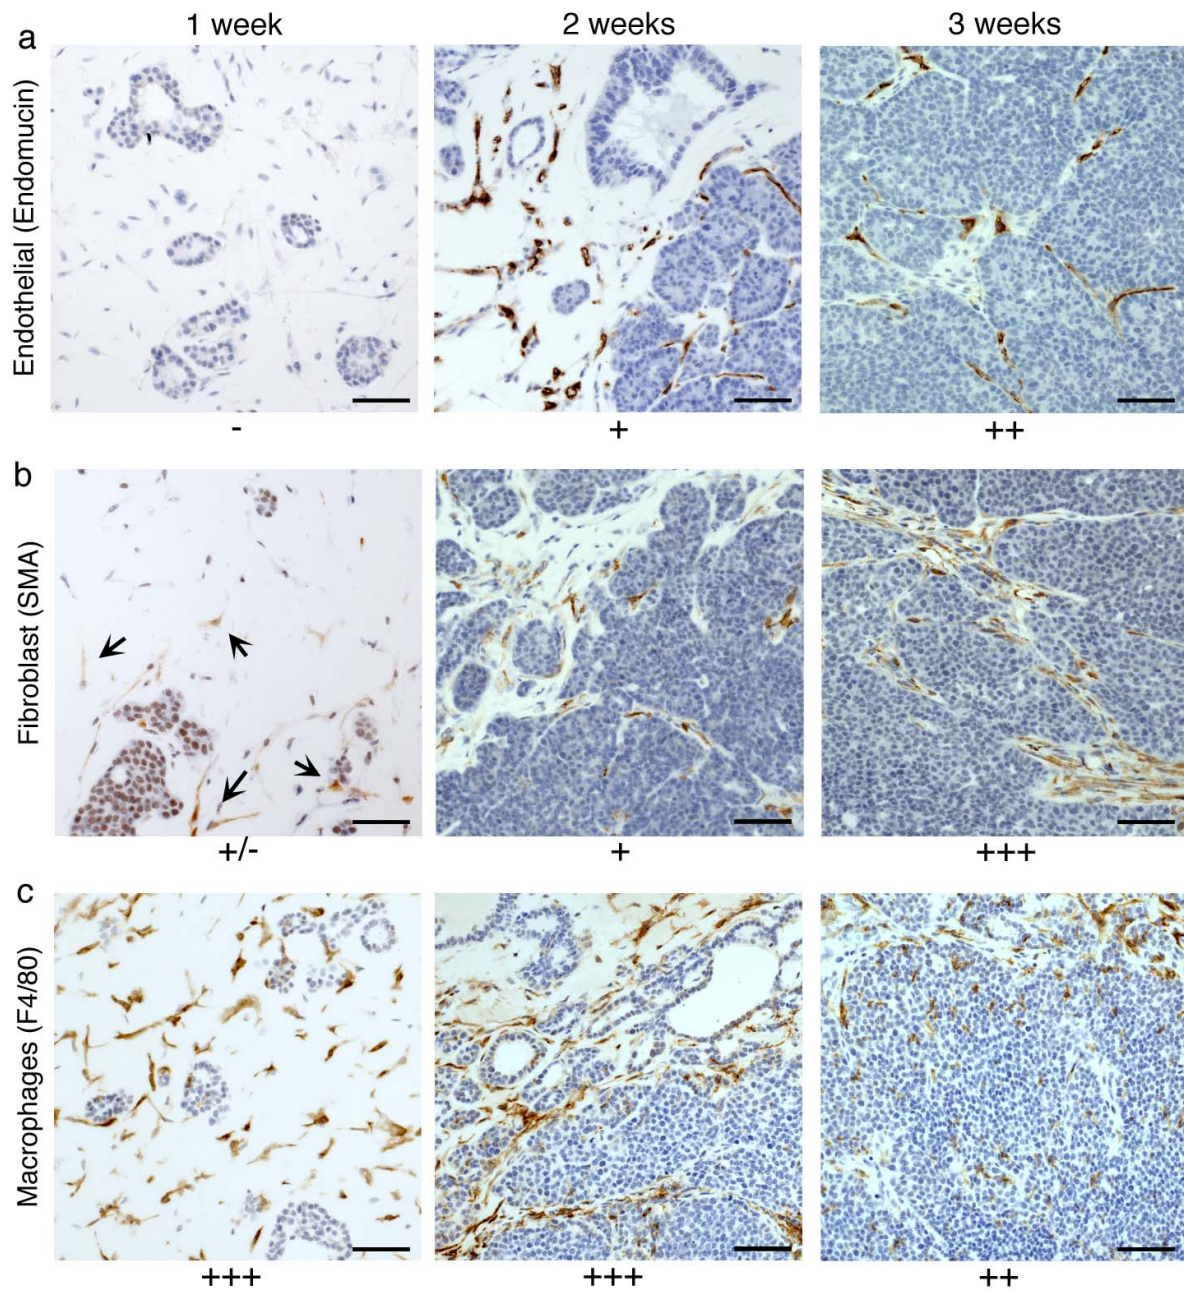

**Supplementary Figure 2. Immunohistochemical staining of infiltrating components**

Immunohistochemical staining of PyMT transplants harvested at 1, 2 or 3 weeks post-transplantation in growth factor reduced matrigel and stained for **a** endomucin (endothelial cells), **b** alpha Smooth Muscle Actin ( $\alpha$ SMA) (arrow at 1 week time point indicate positive fibroblasts) and **c** F4/80 (macrophages). Scale bar: 50  $\mu$ m

## Spontaneous PyMT developing carcinoma

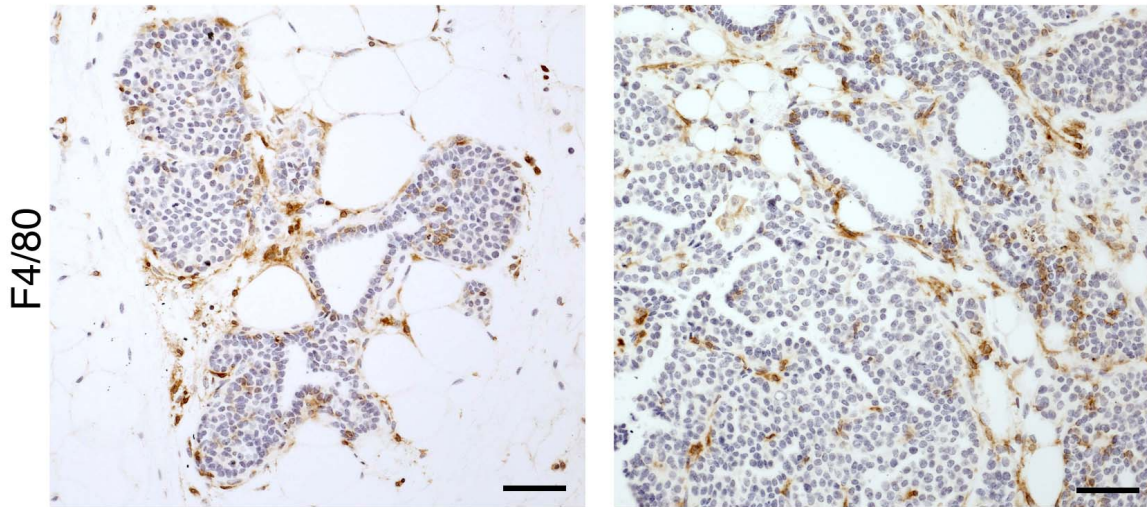

### Supplementary Figure 3. Macrophage infiltration into spontaneous PyMT tumours

Immunohistochemical staining for F4/80 (macrophages) in spontaneous PyMT tumours formed in female MMTV-PyMT mice. Scale bar: 50  $\mu$ m

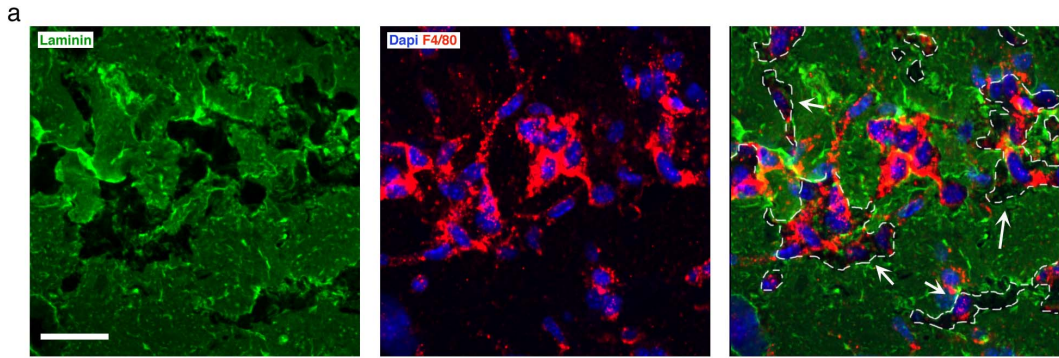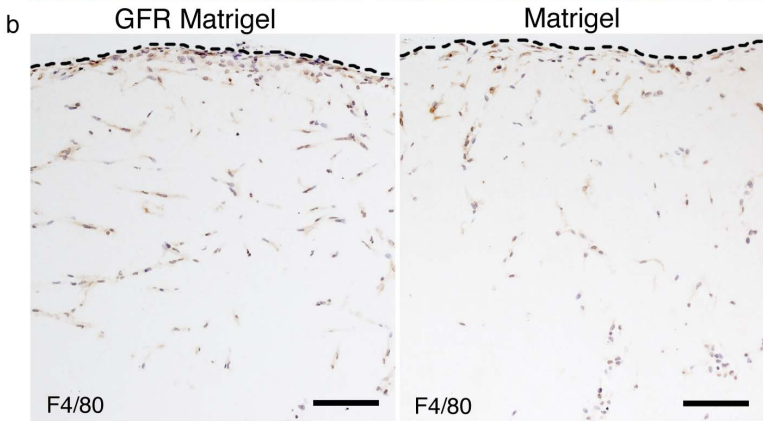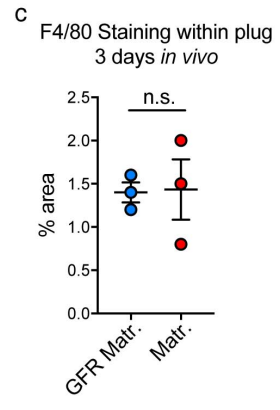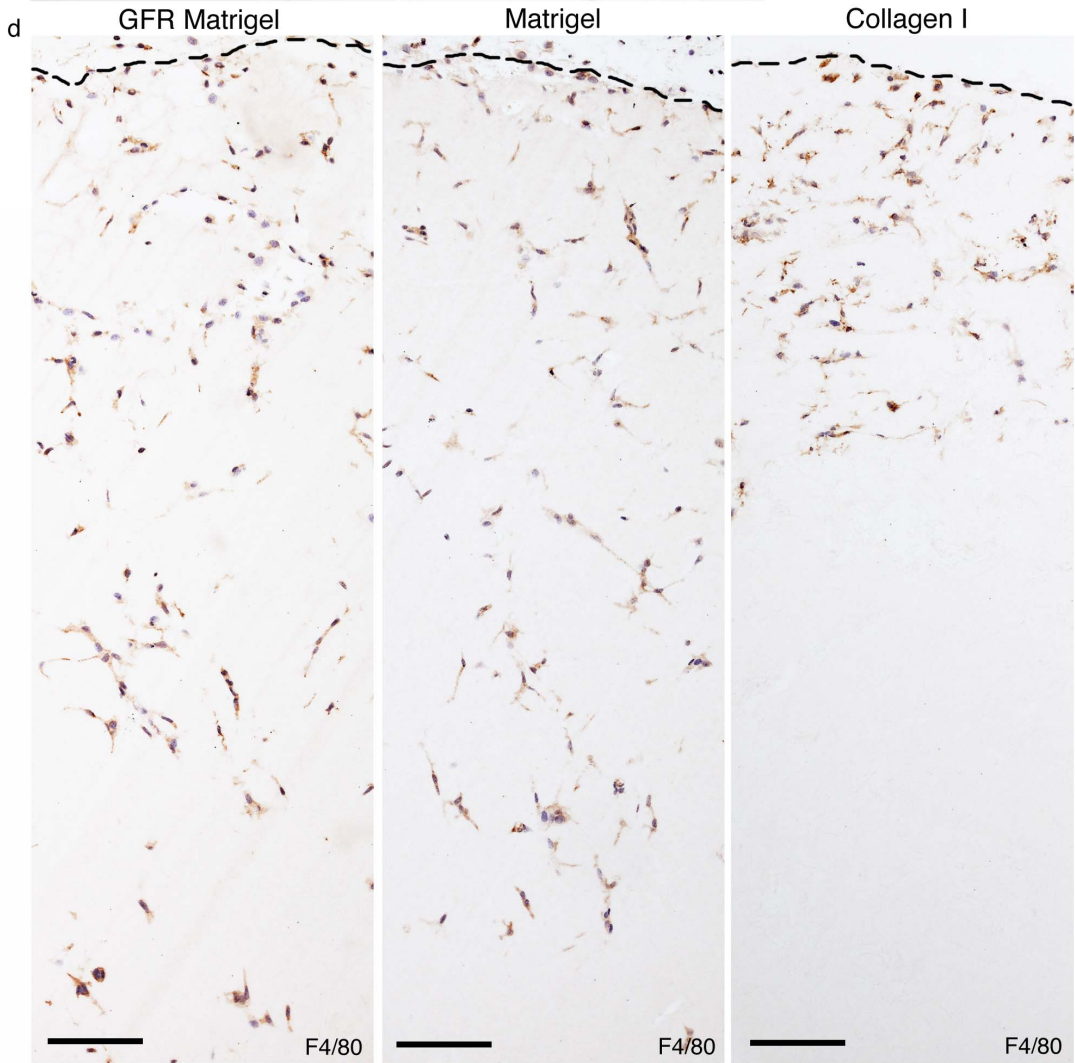

**Supplementary Figure 4. Matrigel ECM components are the main trigger of macrophage recruitment.**

**a** Representative immunofluorescence staining for laminin (green), F4/80 (red) and DAPI (blue) of PyMT plugs harvested 1 week post-transplantation. White lines and arrows show absence of Laminin. Scale bar: 25  $\mu\text{m}$ . **b** Representative immunohistochemical staining for F4/80 3 days post-transplantation of either growth factor reduced (GFR) matrigel or standard matrigel. Scale bar: 100  $\mu\text{m}$ . **c** Quantification of F4/80 staining of plug area in 4x images of either GFR or standard matrigel from b. n.s. P value>0.05 (n=3/group two tail T-test). **d** Representative immunohistochemical staining for F4/80 1 week post-transplantation of GFR matrigel, standard matrigel Collagen I plugs. Scale bar: 100  $\mu\text{m}$ .

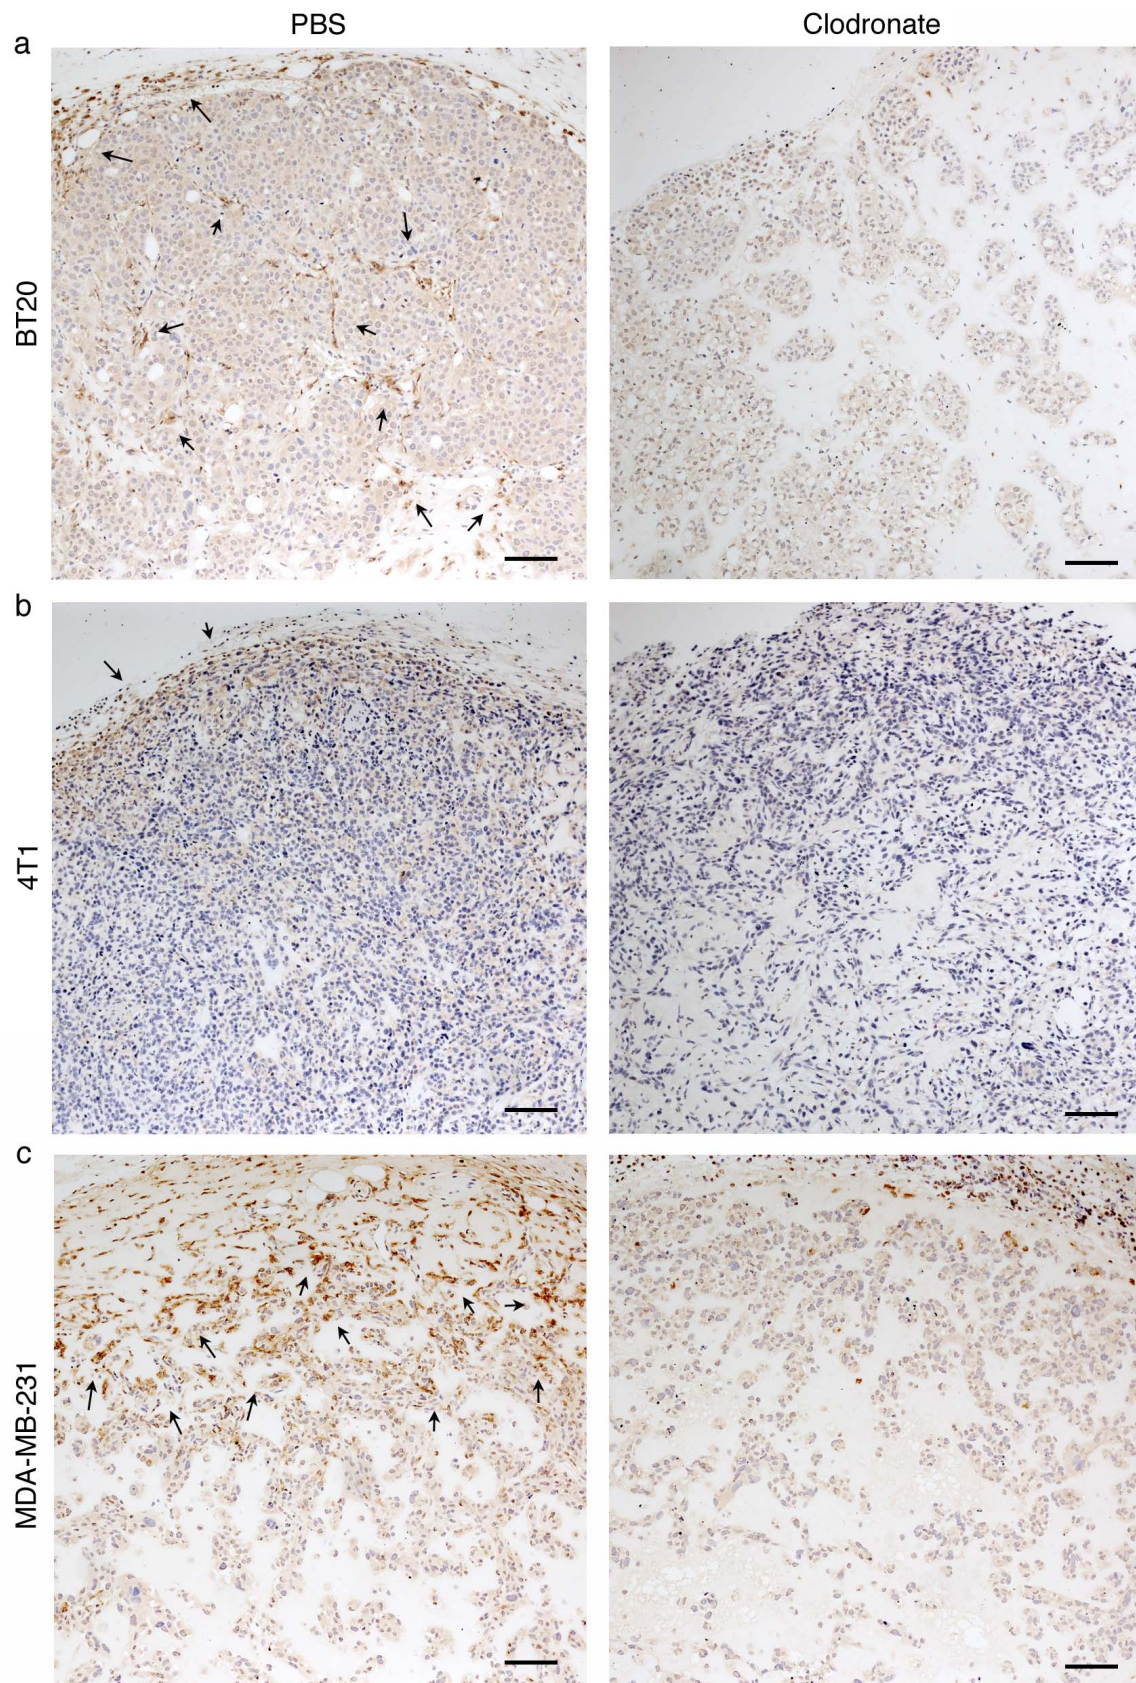

**Supplementary Figure 5. Macrophage infiltration in plugs of human breast cancer lines.**  
 Representative immunohistochemical staining for F4/80 of the different human breast cancer

lines growth either with PBS or Clodronate liposomes in Fig 6. **a** BT20 tumours; **b** 4T1 tumour; **c** MDAMB231 tumour. Scale bar: 100  $\mu\text{m}$ . Arrows indicates F4/80 stained cells.
